# Supplementary material for: Servicio de Investigación y Desarrollo Tecnológico de Extremadura
Source: Royal Society of Chemistry journal article supplement (doi:10.1039/d0ra01562h), 2004-01-01
Supplement: d0ra01562h1.pdf [file d0ra01562h1.pdf]

## Platinum promoted Ag/SBA-15 catalyst effective in selective oxidation of methanol – design and surface characterization

Joanna Wisniewska\*, Izabela Dziedzic, Maria Ziolk

Adam Mickiewicz University, Poznań, Faculty of Chemistry, Uniwersytetu Poznańskiego 8, 61-614 Poznań, Poland

### S1

#### ***Functionalization of SBA-15 support with 3-mercaptopropyltrimethoxysilane (MPTMS)*** [1]

Support was grafted with 3-mercaptopropyltrimethoxysilane (MPTMS) (95%, Sigma-Aldrich) to functionalize its surface before modification with metals. 7 g of the support powder was refluxed in a dry toluene solution (200 mL) containing 18.9 mL MPTMS at 373 K for 18 h. The reagents were not purified before use. The material was recovered by filtration followed by washing in: dry toluene (200 mL), ethanol (200 mL) and distilled water (100 mL). The powder was dried in an oven at 353 K.

### S2

#### **Samples characterization** [1][2]

##### *ICP-OES*

The inductively coupled plasma optical emission spectrometer (ICP-OES) ICPE-9820 (Shimadzu, Japan) with a mini-torch was used for qualitative and quantitative detection of selected elements in studied samples. Before the analysis, about 100 mg of a sample studied and 4 mL H<sub>2</sub>O, 3 mL H<sub>2</sub>SO<sub>4</sub>, 3 mL H<sub>3</sub>PO<sub>4</sub> and 2 mL HF (all reagents were for trace analysis, Sigma Aldrich, USA) were added to a teflon tube and mineralized in Microwave oven (Anton Paar, Austria) in three steps: ramp time 5 min. (1500 W), hold time 50 min. (1500 W) and cooling to 343 K.

### *X-ray diffraction (XRD)*

XRD measurements were carried out on a Bruker AXS D8Advance diffractometer with Cu K $\alpha$  radiation ( $\lambda = 0.154$  nm), with a step size of  $0.05^\circ$  in the small-angle range ( $1^\circ$ – $10^\circ$ ) and with a step size of  $0.2^\circ$  in the wide-angle range ( $6^\circ$ – $60^\circ$ ).

### *N<sub>2</sub> adsorption/desorption isotherms*

The N<sub>2</sub> adsorption-desorption isotherms were obtained at 77 K using a Micromeritics ASAP 2020 Physisorption Analyzer. Before measurements, the samples were degassed at 573 K for 8 h. The surface area was calculated by the BET method, whereas the volume and diameter of pores were determined by the DFT method.

### *UV–vis spectroscopy*

UV–vis spectra were recorded using a Varian-Cary 300 Scan UV–visible spectrophotometer. Powder samples were placed in a cell equipped with a quartz window. The spectra were recorded in the range from 800 to 190 nm. Spectralon was used as the reference material.

### *X-ray Photoelectron Spectroscopy (XPS)*

X-ray Photoelectron Spectroscopy (XPS) was performed on an Ultra-high vacuum photoelectron spectrometer based on Phoibos150 NAP analyzer (Specs, Germany). The analysis chamber was operated under vacuum with a pressure close to  $5 \times 10^{-9}$  mbar and the sample was irradiated with a monochromatic Al K $\alpha$  (1486.6 eV) radiation (15 kV; 10 mA). Spectra were recorded with a flood gun acting as neutralizer. Binding energies were referenced to the Si 2p peak from silica 103.4 eV

### *Transmission electron microscopy (TEM)*

For transmission electron microscopy (TEM) measurements, the powders were deposited on a grid covered with a holey carbon film and transferred to JEOL 2000 electron microscope operating at 80 kV. Samples were made in the form of suspension in 1-butanol.

## References

- [1] J. Czaplinska, P. Decyk, M. Ziolek, Surface properties and catalytic performance of Pt–Ag supported on silica – The effect of preparation methods, *Appl. Catal. A Gen.* 504 (2015) 361–372. doi:10.1016/j.apcata.2014.12.054.
  
- [2] J. Wisniewska, M. Ziolek, N. Artioli, M. Daturi, The effect of niobium and tantalum on physicochemical and catalytic properties of silver and platinum catalysts based on MCF mesoporous cellular foams, *J. Catal.* 336 (2016) 58–74. doi:10.1016/j.jcat.2015.12.018.

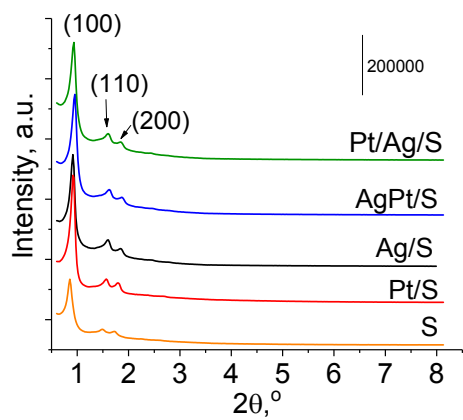

Figure S1. Low-angle XRD patterns of SBA-15 (denoted S) and the support modified with platinum and/or silver.

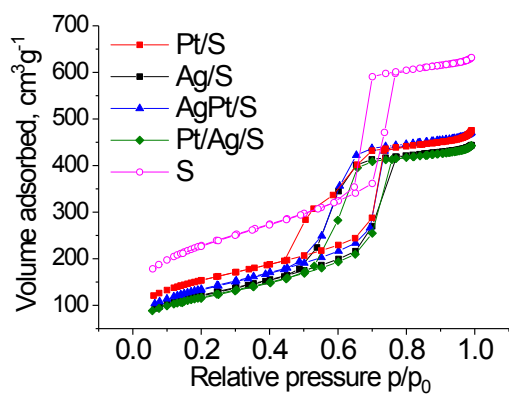

Figure S2. Nitrogen adsorption/desorption isotherms of the samples calcined at 773 K for 4 h.

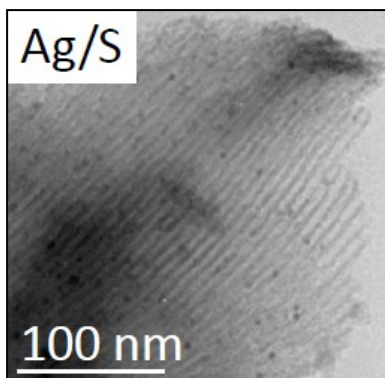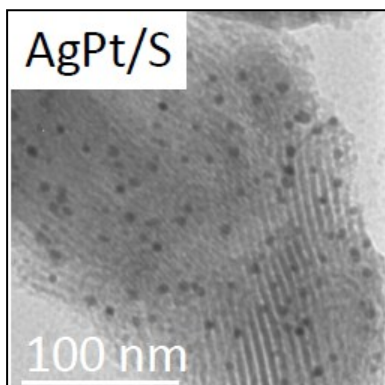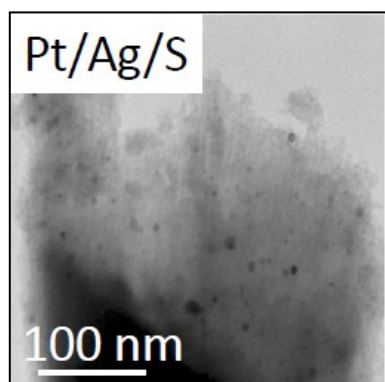

Figure S3. TEM images of the samples activated at 673 K in argon flow (40 mL/min) for 2 h.

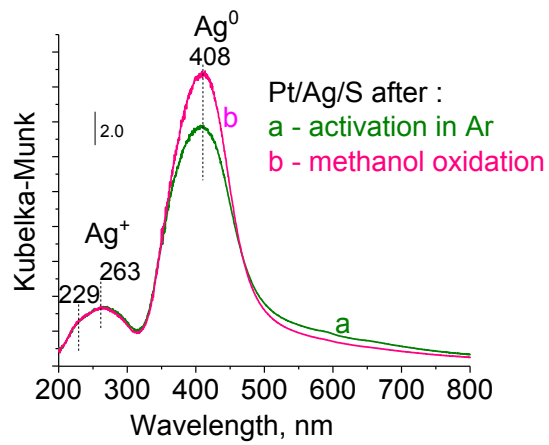

Figure S4. UV-vis spectra of Pt/Ag/S catalyst: activated at 673 K in Ar flow (40 mL/min) for 2 h (a) and after methanol oxidation performed at 523 K for 330 min (b)
